# Supplementary material
Source: Research Square preprint supplement (doi:10.21203/rs.3.rs-9345958/v1)
Supplement: Supplementary file 1 [file 89731fd898dc16b2e2c61e2f.docx]

**Table.1.** Primer information for serotype gene detection

| **Gene** | **Primer Sequence (5'-3')** | **Annealing Temp (°C)** | **Product Size (bp)** | **GenBank** |
| --- | --- | --- | --- | --- |
| ECO-F | CGATGTTGAGCGCAAGGTTG |  |  |  |
| O1-R | CATTAGGTGTCTCTGGCACG | 55 | 263 | GU299791.1 |
| O18-R | AGAAGCATTGAGCTGTGGAC | 56 | 459 | **GU299793.1** |
| O78-R | TAGGTATTCCTGTTGCGGAG | 54 | 623 | **FJ940775.1** |

**Table.2.** Primer information for virulence gene detection

| **Gene** | **Primer Sequence (5'-3')** | **Annealing Temp (°C)** | **Product Size (bp)** | **GenBank** |
| --- | --- | --- | --- | --- |
| *aatA* | F:CATAGGCGTTTCTCTTTCCGAT  R:CCTGTCGTTCATACAGATTCGTT | 55 | 1226 | **AY351860.1** |
| *papC* | F:GCTGATATCACGCAGTCAGT  R:GTCAACAAGAAGACGTGTTCC | 53 | 768 | **NC_004431_P2** |
| *tsh* | F:GTCTGTCAGACGTCTGTGTTTC  R:ATAGGATGACAGGCTACCGAC | 55 | 598 | **NC_007675.1** |
| *vat* | F:TCCATGCTTCAACGTCTCAGAG  R:CTGTTGTCAGTGTCGTGAACG | 52 | 939 | **AY151282** |
| *cva /cvi* | F:TCCAAGCGGACCCCTTATAG  R:CGCAGCATAGTTCCATGCT | 50 | 598 | **AF091526** |
| *iss* | F:ATCACATAGGATTCTGCCG  R:CAGCGGAGTATAGATGCCA | 55 | 309 | **AF042279.1** |
| *iucD* | F:GAAGCATATGACACAATCCTG  R:CAGAGTGAAGTCATCACGCAC | 56 | 613 | **AF335540.1** |
| *irp2* | F:CTGATGAACTCACTCGCTATCC  R:AGCATCTCCTGGCTCTGCTC | 56 | 440 | **AE014075** |
| Hemolysin(HIY) | F:GGCCACAGTCGTTTAGGGTGCTTACC  R:GGCGGTTTAGGCATTCCGATACTCAG | 56 | 450 | **NC_000913.3** |

**Table.2.(Continued)** Primer information for virulence gene detection

| **Gene** | **Primer Sequence (5'-3')** | **Annealing Temp (°C)** | **Product Size (bp)** | **GenBank** |
| --- | --- | --- | --- | --- |
| Pathogenicity islands(aeA) | F:ATATCCGTTTTAATGGCTATCT  R:AATCTTCTGCGTACTGTGTTCA | 53 | 425 | **NC_008563** |

**Table.3.** Primer information for antimicrobial resistance gene detection

| **Gene** | **Primer Sequence (5'-3')** | **Annealing Temp (°C)** | **Product Size (bp)** | **GenBank** |
| --- | --- | --- | --- | --- |
| *blaTEM* | F:CATTTCCGTGTCGCCCTTATTCT  R:CGTTCATCCATAGTTGCCTGAC | 55 | 800 | **NG_068216.1** |
| *blaCTX-M* | F: TTAGGAAGTGTCGCCGCTGTA  R: CGGTTTTATCCCACAACC | 53 | 655 | **AJ416345.1** |
| *blacrX-M* | F: ATGTGCAGYACCAGTAARGT  R: TGGGTRAARTARGTSACCAGA | 54 | 593 | **AJ416345.1** |
| *blacrX-M-1* | F: GTTACAATGTGTGAGAAGCAG  R: CCGTTTCCGCTATTACAAC | 54 | 1018 | **AJ416345.1** |
| *blacrX-M-9* | F: ATGGTGACAAAGAGAGTGCA  R: CCCTTCGGCGATGATTCTC | 54 | 870 | AJ416345.1 |
| *blaZX-M* | F: ATGAGTATTCAACATTCCGT  R: TTACCAGTCTTATCAGTGA | 55 | 861 | FJ405391.1 |
| *sul1* | F: ACGTATTGCGCGGCTCTT  R: TGGGTGCGGACGTAGTCA | 55 | 555 | **U04277.1** |
| *strA* | F: CATTCTGACTGGTTGCCTGT R: GCATTGAAGAGTTTTAGGGTC | 55 | 564 | **NC_011602.1** |

**Table.3.(Continued)** Primer information for antimicrobial resistance gene detection

| **Gene** | **Primer Sequence (5'-3')** | **Annealing Temp (°C)** | **Product Size (bp)** | **GenBank** |
| --- | --- | --- | --- | --- |
| *strB* | F: TGCTCATTGGCACGTTTCCGA R: TCTGTCGCACCTGCTTGATC | 55 | 803 | **M96392** |
| *gyrB* | F: CTGCCGGGAAACTGGCAGA  R: TCGACGTCCGCATCGGTCAT | 56 | 299 | **AY464207.1** |
| *qnrS* | F: GCAAGTTCATTGAACAGGGT R: TCTAAACCGTCGAGTTCGGCG | 53 | 428 | **NG_050543.1** |
| *ermB* | F: ATTGGAACAGGTAAGGGC R: GAACATCTGTGGTATGGCG | 53 | 442 | **AF239773.1** |
| *tetA* | *F: GCTACATCCTGCTTGCTTTC*  *R: CATAGATCGCCGTGAAGAGG* | 53 | 210 | **NC_005327.1** |
| *tetG* | *F: GCTCGGTGGTATCTCTGCTC R: AGCACAGAATCGGGAACAC* | 53 | 468 | **AF133139.1** |

**Table.4.** Isolation rate of *Escherichia col*i from different sample types

| Sample Type | Number of Samples | Number of Isolates | Isolation Rate (%) |
| --- | --- | --- | --- |
| Cloacal swabs | 130 | 19 | 14.6 |
| Fecal samples | 130 | 17 | 13.1 |
| Environmental swabs | 430 | 34 | 7.9 |
| Total | 690 | 70 | 10.1 |

**Table.5.** Serogroup distribution results

| Serogroup | Number of Isolates | Percentage (%) |
| --- | --- | --- |
| O1 | 9 | 12.86 |
| O18 | 3 | 4.29 |
| O78 | 24 | 34.29 |

**Table.5. (Continued)**Serogroup distribution results

| Serogroup | Number of Isolates | Percentage (%) |
| --- | --- | --- |
| Untypable | 34 | 48.57 |

**Table.6.** Detection of virulence genes

| Virulence Gene | Number of Positive Strains | Detection Rate (%) |
| --- | --- | --- |
| *iucD* | 66 | 94.29 |
| *HIY* | 66 | 94.29 |
| *irp2* | 39 | 55.71 |
| *tsh* | 39 | 55.71 |
| *aatA* | 36 | 47.14 |
| *cva/cvi* | 15 | 21.43 |
| *iss* | 12 | 12.86 |
| *vat* | 6 | 8.71 |
| *papC* | 6 | 8.57 |
| *aeA* | 6 | 8.75 |

**Table.7.** Co-occurrence analysis of major virulence genes (%) (n=70)

| **Gene** | ***HIY*** | ***irp2*** | ***tsh*** | ***iucD*** | ***cva/cvi*** | ***vat*** | ***aeA*** | ***iss*** | ***papC*** | ***aatA*** |
| --- | --- | --- | --- | --- | --- | --- | --- | --- | --- | --- |
| *HIY* | 0 |  |  |  |  |  |  |  |  |  |
| *irp2* | 0 | 0 |  |  |  |  |  |  |  |  |
| *tsh* | 91.4 | 54.3 | 0 |  |  |  |  |  |  |  |
| *iucD* | 91.4 | 54.3 | 0 | 0 |  |  |  |  |  |  |
| *cva/cvi* | 91.4 | 54.3 | 0 | 0 | 0 |  |  |  |  |  |
| *vat* | 91.4 | 54.3 | 0 | 0 | 0 | 0 |  |  |  |  |
| *aeA* | 91.4 | 54.3 | 0 | 0 | 0 | 0 | 0 |  |  |  |
| *iss* | 0 | 0 | 17.1 | 17.1 | 17.1 | 17.1 | 17.1 | 0 |  |  |
| *papC* | 0 | 0 | 8.6 | 8.6 | 8.6 | 8.6* | 8.6 | 0 | 0 |  |
| *aatA* | 0 | 0 | 51.4* | 51.4 | 51.4* | 51.4* | 51.4 | 0 | 0 | 0 |

**Table.8.** Antimicrobial resistance rates of *E. coli* isolates against 14 antibiotics

| **Antibiotic Class** | **Antibiotic** | **Number of Resistant Isolates** | **Resistance Rate (%)** |
| --- | --- | --- | --- |
| β-lactams | Ampicillin (AM) | 58 | 83.96 |
| Cefazolin (CZ) | 49 | 70.00 |
| Amoxicillin (AMX) | 63 | 90.00 |
| Aminoglycosides | Gentamicin (GM) | 25 | 35.71 |
| Amikacin (AK) | 2 | 2.86 |
| Spectinomycin/Lincomycin (SPC) | 70 | 100.00 |
| Apramycin (APr) | 64 | 91.43 |
| Neomycin (NEO) | 49 | 70.00 |
| Amphenicols | Florfenicol (FFC) | 53 | 75.71 |
| Macrolides | Erythromycin (E) | 70 | 100.00 |
| Quinolones | Ciprofloxacin (CIP) | 47 | 67.14 |
| Norfloxacin (NOR) | 52 | 74.26 |
| Fluoroquinolones | Enrofloxacin (ENY) | 55 | 78.57 |
| Lincosamides | Clindamycin (CLN) | 70 | 100.00 |
| Tetracyclines | Oxytetracycline (OXY) | 31 | 44.29 |
| Polypeptides | Colistin (C) | 67 | 95.71 |

**Table.9.** Antimicrobial resistance patterns of 70 avian pathogenic *Escherichia col*i isolates

| **Pattern** | **No. of Isolates** | **Resistance Pattern** |
| --- | --- | --- |
| A | 3 | AMX, SPC, Apr, E, CLN, C |
| B | 2 | CZ, AMX, SPC, Apr, NEO, FFC, E, CLN, C |
| C | 2 | AM, AMX, SPC, Apr, NEO, FFC, E, NOR, ENY, CLN, C |
| D | 1 | AM, AMX, SPC, Apr, NEO, FFC, E, CIP, ENY, CLN, C |
| E | 3 | AMX, GM, SPC, Apr, NEO, FFC, E, CIP, CLN, OXY, C |

**Table.9.** **(Continued)**Antimicrobial resistance patterns of 70 avian pathogenic *Escherichia col*i isolates

| **Pattern** | **No. of Isolates** | **Resistance Pattern** |
| --- | --- | --- |
| F | 3 | AM, CZ, AMX, GM, SPC, Apr, NEO, FFC, E, ENY, CLN, OXY, C |
| G | 3 | AM, CZ, AMX, SPC, Apr, E, CIP, NOR, ENY, CLN, OXY, C |
| H | 5 | AM, AMX, GM, SPC, Apr, NEO, FFC, E, CIP, NOR, CLN, C |
| I | 3 | CZ, AMX, GM, SPC, Apr, NEO, FFC, E, CIP, NOR, ENY, CLN, OXY, C |
| J | 4 | AM, AMX, GM, SPC, Apr, NEO, FFC, E, NOR, ENY, CLN, OXY, C |
| K | 10 | AM, CZ, AMX, SPC, Apr, NEO, FFC, E, CIP, NOR, ENY, CLN, OXY, C |
| L | 5 | AM, CZ, AMX, GM, SPC, Apr, NEO, FFC, E, NOR, ENY, CLN, OXY, C |
| M | 8 | AM, AMX, GM, SPC, Apr, NEO, FFC, E, CIP, NOR, ENY, CLN, OXY, C |
| N | 4 | AM, CZ, AMX, GM, SPC, Apr, NEO, FFC, E, CIP, NOR, ENY, CLN, C |
| O | 6 | AM, CZ, AMX, GM, SPC, Apr, NEO, E, CIP, NOR, ENY, CLN, OXY, C |
| P | 8 | AM, CZ, AMX, GM, SPC, Apr, NEO, FFC, E, CIP, NOR, ENY, CLN, OXY, C |

**Table.10.** Detection of antimicrobial resistance genes

| **Resistance Gene** | **Number of Positive Isolates** | **Detection Rate (%)** |
| --- | --- | --- |
| *strA* | 46 | 65.7 |
| *gyrB* | 44 | 62.9 |
| *blacrX-M* | 36 | 51.4 |
| *blaTEM* | 34 | 48.6 |
| *qnrS* | 33 | 47.1 |
| *blazX-M* | 29 | 41.4 |
| *blaCTX-M* | 28 | 40.0 |
| *strB* | 27 | 38.6 |
| *blacrX-M-1* | 26 | 37.1 |
| *sul1* | 24 | 34.3 |
| *blacrX-M-9* | 23 | 32.9 |
| *ermB* | 19 | 27.1 |
| *tetA* | 38 | 54.3 |

**Table.10.(Continued)** Detection of antimicrobial resistance genes

| **Resistance Gene** | **Number of Positive Isolates** | **Detection Rate (%)** |
| --- | --- | --- |
| *tetG* | 36 | 51.4 |
